# Supplementary material for: FAPRP: A Machine Learning Approach to Flooding Attacks Prevention Routing Protocol in Mobile Ad Hoc Networks
Source: Hindawi journal article supplement (doi:10.1155/2019/6869307), 2019-01-10
Supplement: f1 [file 6869307.f1.zip]

Archive with 10 entries (9 files):
- 6869307.f1/
- 6869307.f1/aodv_cc.rar
- 6869307.f1/baodv_cc.rar
- 6869307.f1/DATA.rar
- 6869307.f1/faprp_cc.rar
- 6869307.f1/fdaodv_cc.rar
- 6869307.f1/fdbaodv_cc.rar
- 6869307.f1/fdfaprp_cc.rar
- 6869307.f1/Figures.rar
- 6869307.f1/TCL.rar
